# Supplementary material for: Copper(ii) complexes of terminally free alloferon mutants containing two histidyl binding sites inside peptide chain structure and stability
Source: Royal Society of Chemistry journal article supplement (doi:10.1039/c5dt01911g), 2015-01-01
Supplement: c5dt01911g1.pdf [file c5dt01911g1.pdf]

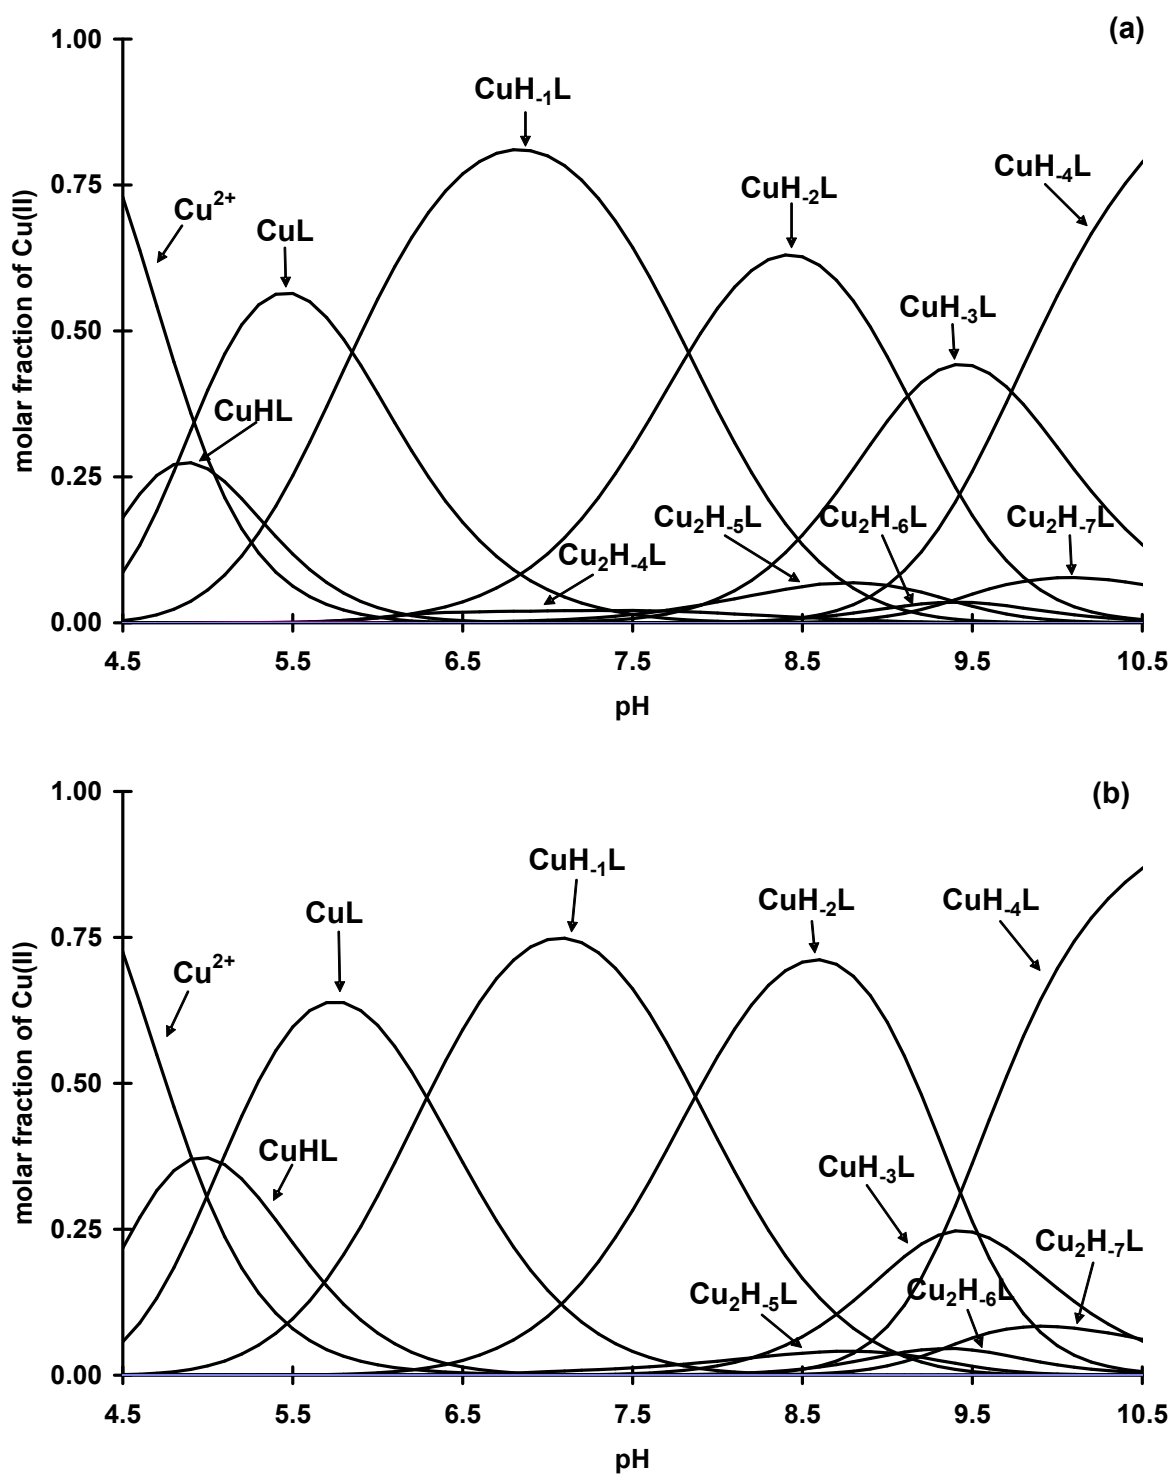

**Fig. 1S†** Concentration distribution of the complexes formed in Cu(II)-to-peptide molar ratio 1:1 as a function of pH. [Cu(II)]=0.001M. (a) Cu(II)-H1A/H9A system (b) Cu(II)-H1A/H6A system

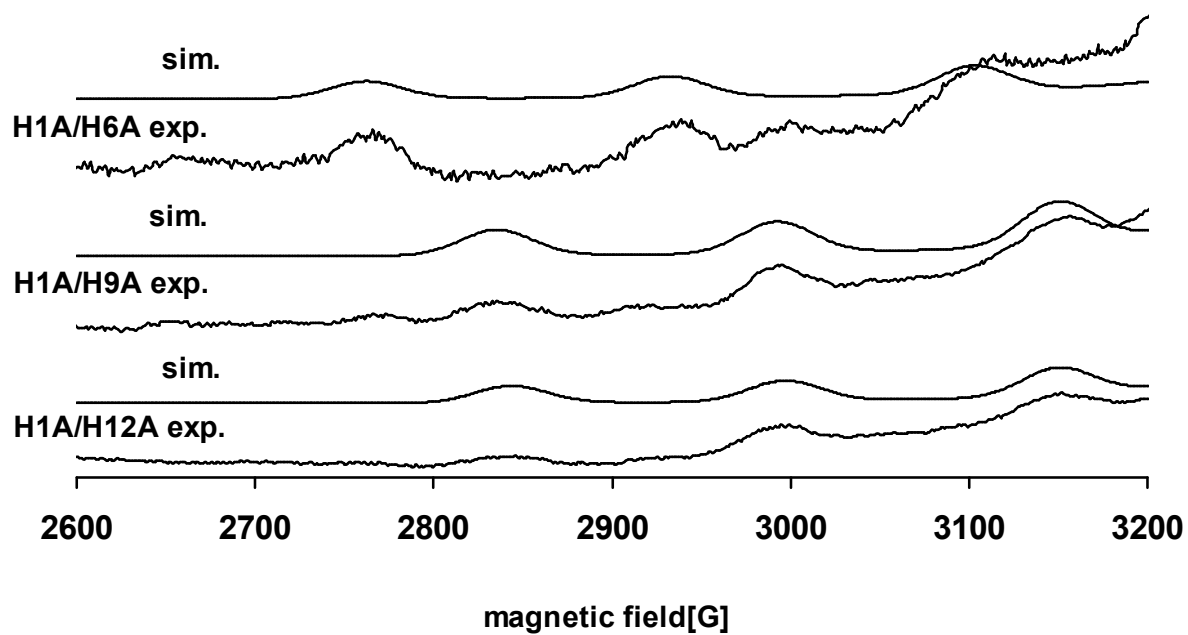

**Fig. 2S†** Frozen solution EPR spectra (simulated and experimental) of the CuL complexes for the Cu(II)-H1A/H12A (pH 5.5), Cu(II)-H1A/H9A (pH 5.3) and Cu(II)-H1A/H6A (pH 5.6). Metal-to-ligand molar ratio 1:1.

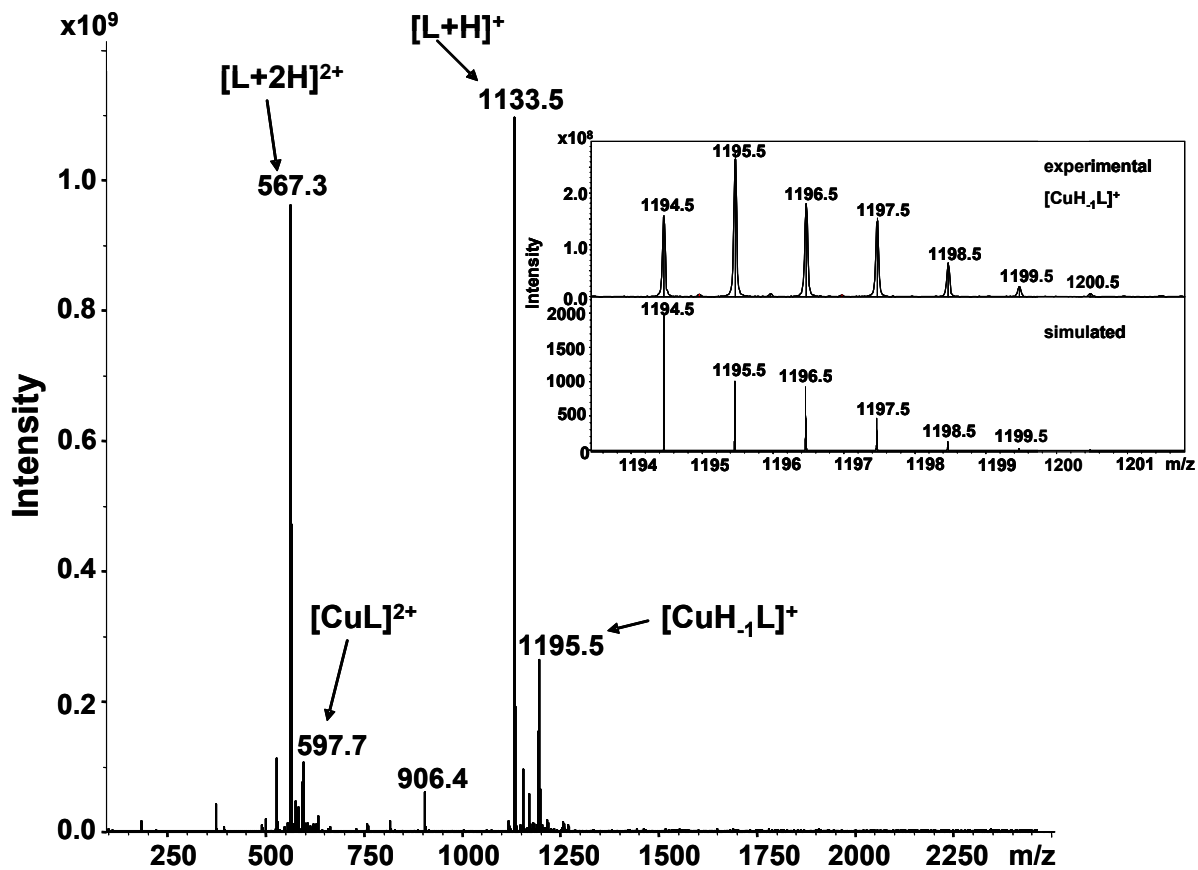

**Fig. 3S†** ESI mass spectrum for the Cu(II)-H1A/H12A system at 1:1 molar ratio in water solution. Experimental and simulated spectra for the  $[CuH_{-1}L]^+$  molecular ion with  $m/z$  1195.5 Da.

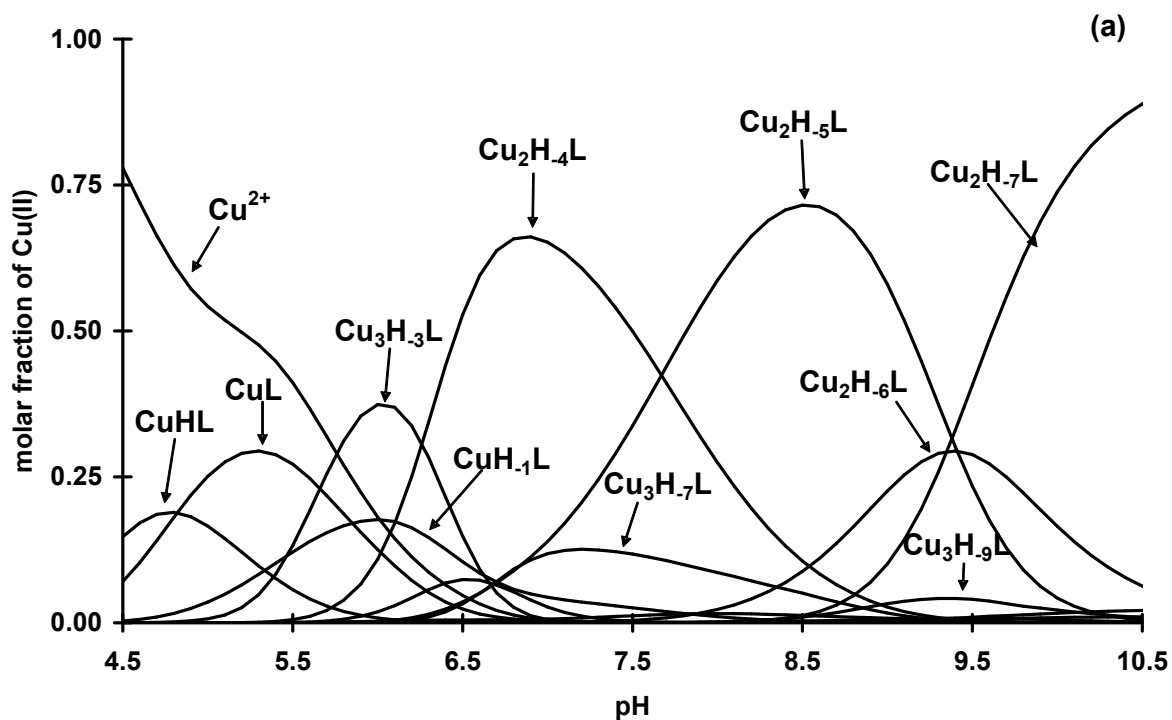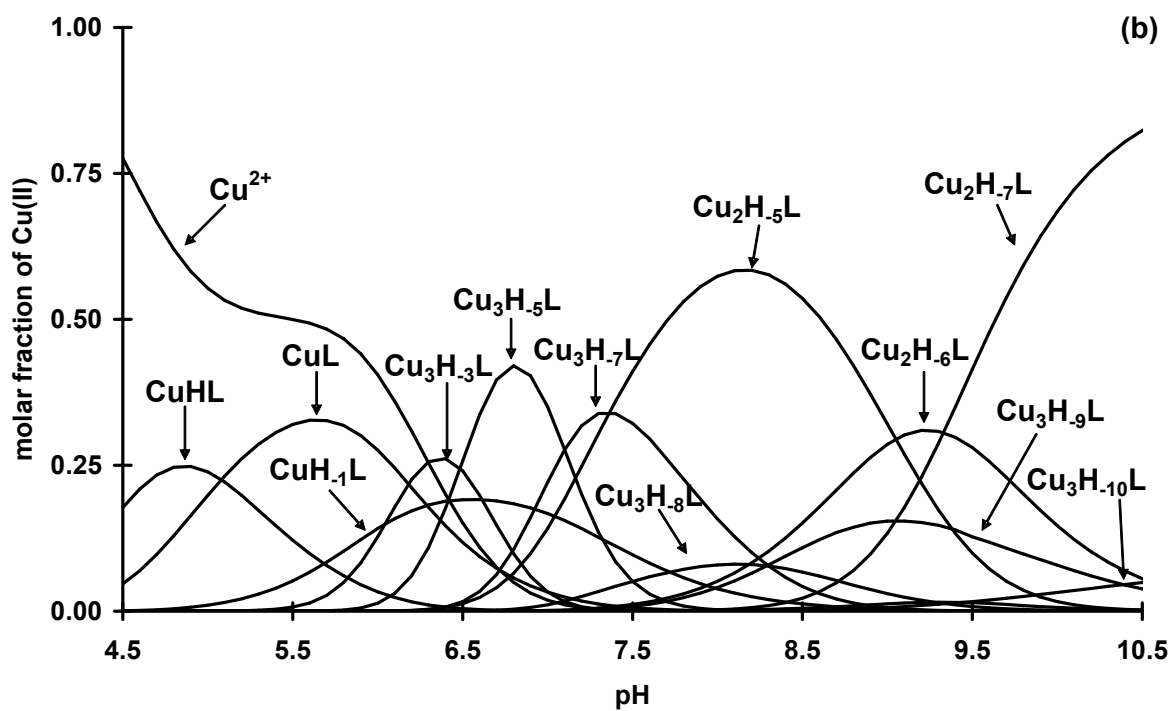

**Fig. 4S†** Concentration distribution of the complexes formed in Cu(II)-to-peptide molar ratio 2:1 as a function of pH.  $[\text{Cu(II)}]=0.002\text{M}$ . (a) Cu(II)-H1A/H9A system (b) Cu(II)-H1A/H6A system

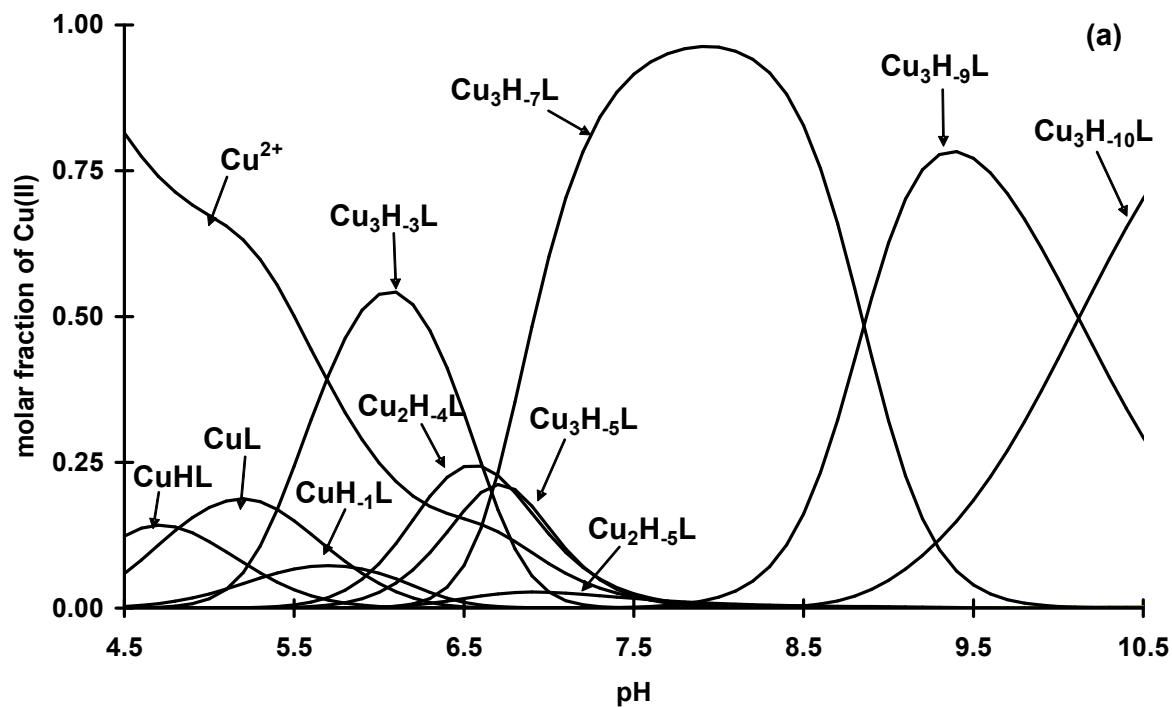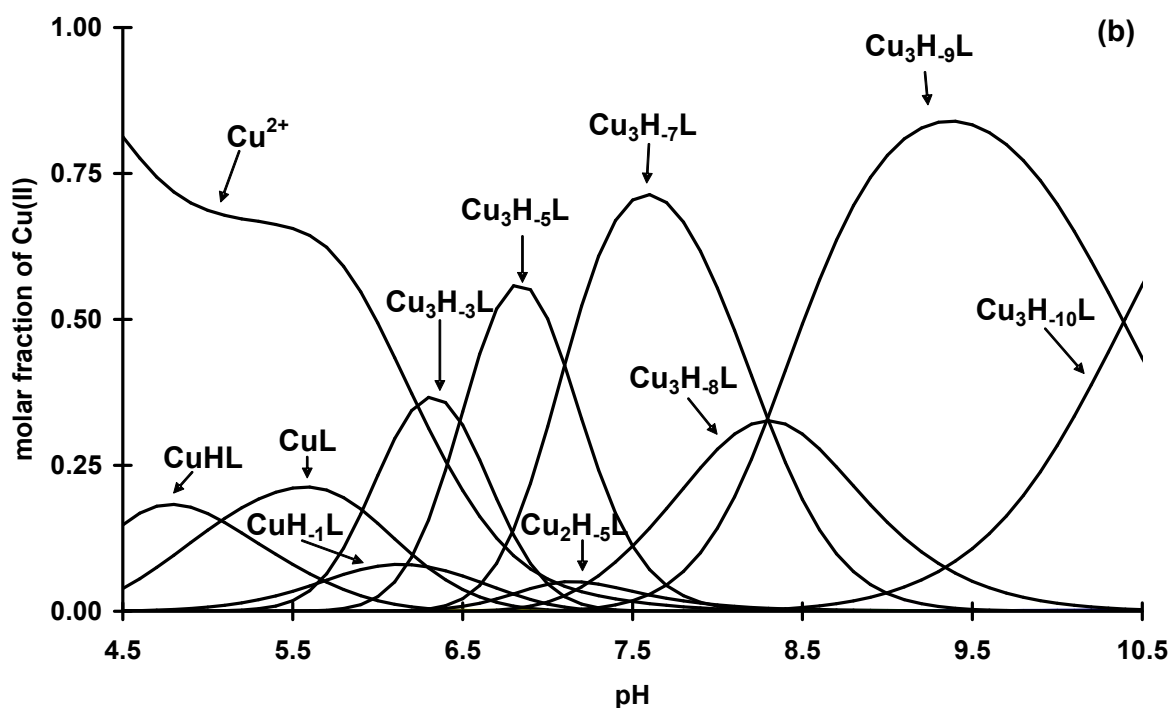

**Fig. 5S†** Concentration distribution of the complexes formed in Cu(II)-to-peptide molar ratio 3:1 as a function of pH.  $[\text{Cu(II)}]=0.003\text{M}$ . (a) Cu(II)-H1A/H9A system (b) Cu(II)-H1A/H6A system

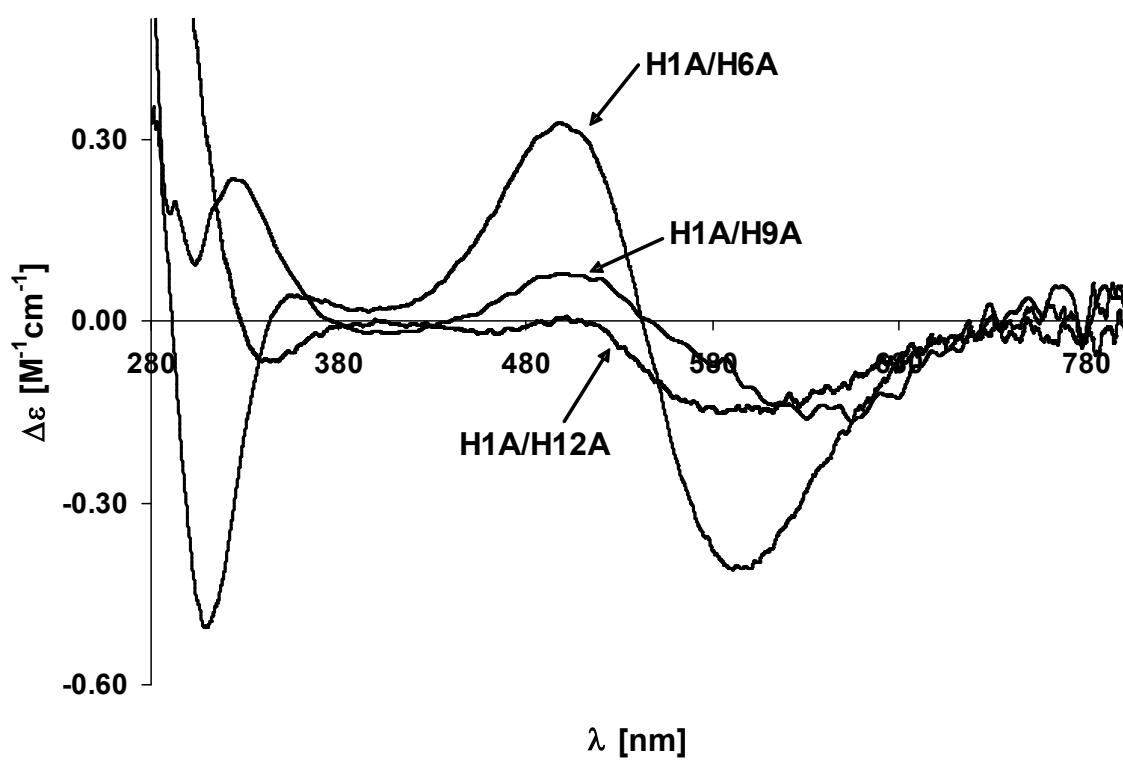

**Fig. 6S†** CD spectra of the Cu(II)-H1A/H12A, Cu(II)-H1A/H9A and Cu(II)-H1A/H6A systems of the  $Cu_2H_5L$  complexes

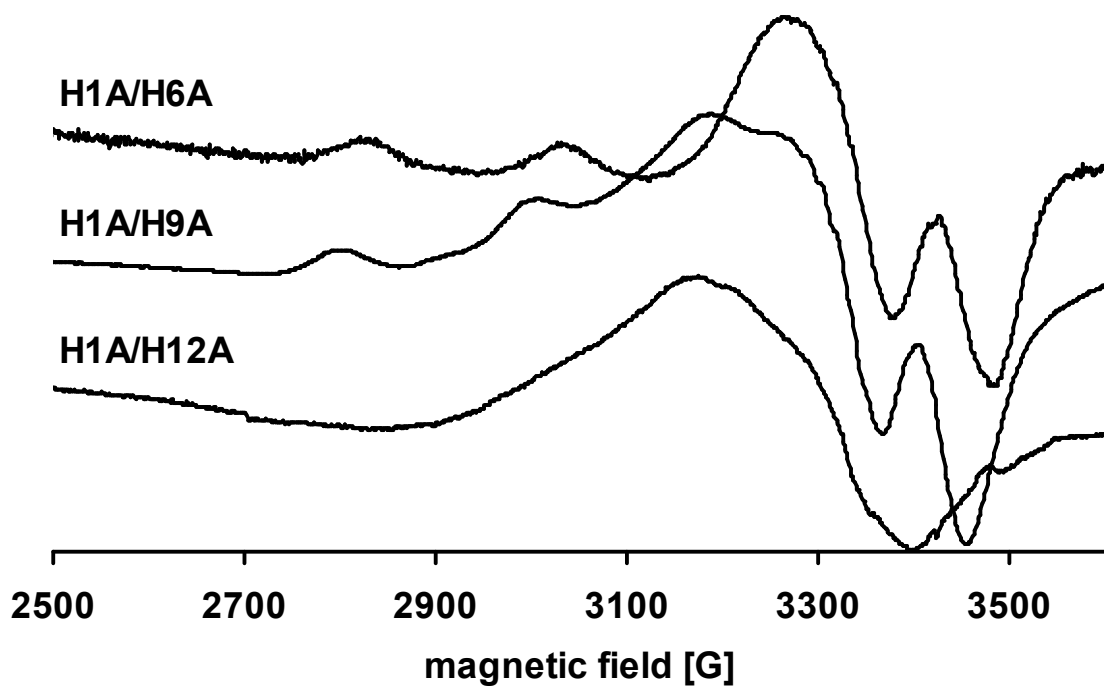

**Fig. 7S†** Frozen solution EPR spectra of the Cu(II)-H1A/H6A, Cu(II)-H1A/H9A and Cu(II)-H1A/H12A systems of the  $\text{Cu}_3\text{H}_9\text{L}$  or  $\text{Cu}_3\text{H}_{10}\text{L}$  complexes formed in 3:1 metal-to ligand molar ratio at pH about 11
